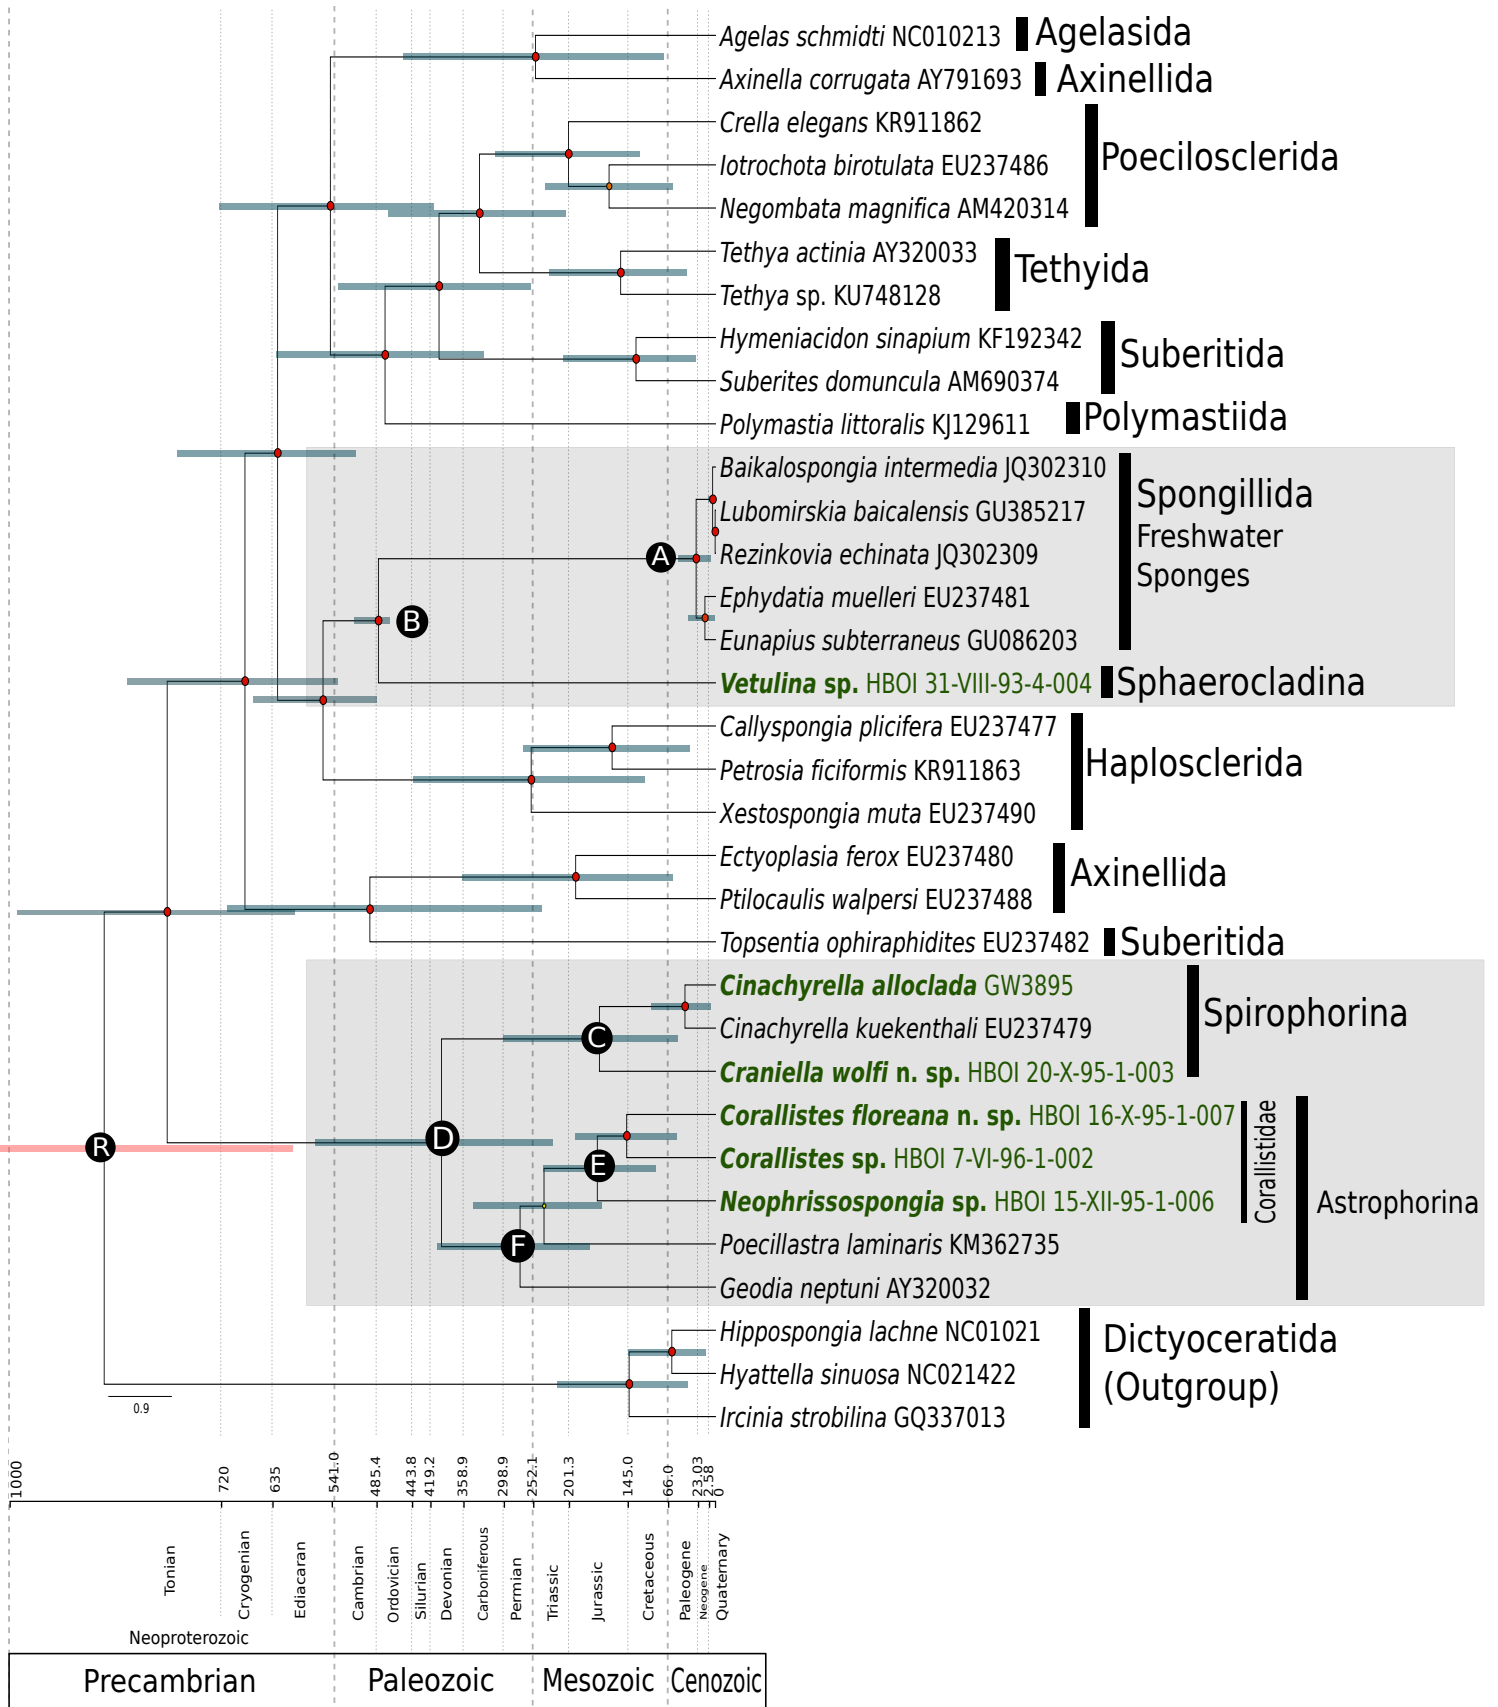

Source: https://www.biorxiv.org/content/biorxiv/suppl/2017/07/09/159806.DC1/159806-4.pdf
